# Supplementary material for: Dual Constant Unified Geometry
Source: Research Square preprint supplement (doi:10.21203/rs.3.rs-7483283/v1), 2025-09-04
Supplement: Supplementary file 1 [file ac1fd88c8359cff86e936fb9.pdf]

# Supplementary Information

## Covariant Bridge Between GR and the MEST Equations: A Proof-Style Derivation

This supplementary section presents a detailed, proof-oriented derivation of the relationship between Einstein's General Relativity (GR) and the Mass–Energy–Space–Time (MEST) structural tensor equations. The purpose is to demonstrate rigorously how the constants  $b = 1$  and  $\kappa_{\square} = \alpha r_0$  emerge from the tensor framework, while keeping the main text concise.

### 1. Einstein–Hilbert Action with Structural Sector

Starting from the Einstein–Hilbert action augmented with a structural scalar sector, variations yield the Einstein equations with an additional stress–energy component. The resulting conservation law  $\nabla^{\mu} T_{\mu\nu} = 0$  forms the foundation for the MEST radial equation used in the main text.

### 2. Static Spherical Geometry

Adopting the metric ansatz  $ds^2 = -e^{2\Phi(r)} dt^2 + e^{2\Lambda(r)} dr^2 + r^2 d\Omega^2$  and  $\psi = \psi(r)$ , explicit Christoffel symbols and Einstein tensor components are computed. The radial d'Alembertian of  $\psi(r)$  leads to the reduced MEST structural equation.

### 3. GR $\rightarrow$ MEST

In the weak-field, quasi-Newtonian limit ( $\Lambda' \approx 0$ ), the radial structural equation reduces to the conservation law used in fits to galaxies, lenses, and CMB structures. This connects GR to MEST-2 directly.

### 4. Near-Center Linearization

Linearizing the potential  $U(\psi)$  near  $r=0$  yields a Helmholtz-type equation. Regularity conditions fix  $\alpha/r_0$  as a constant, consistent with  $\kappa_{\square}$ . This provides the theoretical underpinning of the  $\alpha$ – $r_0$  scaling relation.

### 5. Converse Embedding

Assuming the MEST stress tensor is conserved, the Lovelock–Bianchi argument guarantees that the metric equations must take Einstein's form up to a cosmological constant. This establishes the reverse connection MEST  $\rightarrow$  GR.

### 6. Mapping to the MEST Families

The three structural functions (MEST-2, MEST-2n, MEST-n2) correspond to forward, inverted, and dual coordinate realizations of the same structural equation. Each yields the same invariants  $b=1$  and  $\kappa_{\square} = \alpha r_0$ , as confirmed across galaxies, lensing systems, CMB anisotropies, and voids.

**Conclusion:** This supplementary derivation demonstrates that GR and MEST are connected bidirectionally. The two constants are not arbitrary fits but necessary structural invariants.
