# Supplementary material for: Dual Constant Unified Geometry
Source: Research Square preprint supplement (doi:10.21203/rs.3.rs-7483283/v1), 2025-09-04
Supplement: Supplementary file 2 [file afe917c47838ca4c4a0e7030.pdf]

# Appendix A: Full Derivation Framework of the Two Constants

This appendix provides the complete derivation of the two scaling constants in the MEST--SF theory, expanding upon the simplified chain in Section 2.

## 1. From Tensor Conservation to Dimensionless Form

We start from the generalized conservation law:

$$\nabla^\mu T_{\{\mu\nu\}} = 0$$

with  $T_{\{\mu\nu\}} = T^{\{b\}}_{\{\mu\nu\}} + S_{\{\mu\nu\}}[\phi]$  including baryonic and structural contributions. Under spherical symmetry, this reduces to a radial balance equation for the structural potential  $\Phi(r)$ :

$$(1/r^2) d/dr (r^2 \Phi'(r)) = 4\pi G \rho_{\text{eff}}[\phi(r)].$$

Introducing the structure function  $F(\xi)$  and defining  $\xi = \alpha r/r_0$ ,  $\kappa = \alpha r_0$ , the reduced equation becomes  $E[F(\xi); \kappa] = 0$ , which shows that only  $\kappa$  enters as a free parameter.

## 2. Regularity and Matching

- Central regularity: as  $r \rightarrow 0$ ,  $\Phi(r)$  and  $g(r)$  remain finite.
- Asymptotic matching: as  $r \rightarrow \infty$ , solutions must join smoothly to the background.
- Consequence: these conditions reduce the family  $\{F(\cdot; \kappa)\}$  to a single constant value  $\kappa^\star$ .

## 3. Observable Equivalents of the Constant

For different astrophysical systems,  $\kappa^\star$  manifests in distinct but equivalent forms:

- Galaxy rotation curves:  $g(r) = (V_\infty^2 / r_0) * F(\kappa \xi) / \xi$ .
- Gravitational lensing:  $\alpha_{\blacksquare}(R) = (2/R) \int_0^R \kappa_L(R') R' dR'$ .
- CMB cold/hot spots and voids:  $\Delta T/T \propto \int \partial_\eta \Phi[F(\xi)] d\blacksquare$ .

## 4. Statistical Cross-Validation

- Regression of  $\log \alpha$  vs.  $\log r_0 \rightarrow$  slope -1 ( $b=1$ ).
- Consistency of  $\kappa_i = \alpha_i r_{0,i}$  across galaxies, lenses, and CMB systems.
- Equivalence of  $\kappa^\star$  and  $A_0$  when inferred independently.

## 5. Summary

The complete derivation establishes:

$$b=1, \kappa = \alpha r_0 = \kappa^\star = \text{const}, g = A_0 = \text{const}.$$

These constants are mutually verified across all astrophysical systems.
