# Supplementary material for: Dual Constant Unified Geometry
Source: Research Square preprint supplement (doi:10.21203/rs.3.rs-7483283/v1), 2025-09-04
Supplement: Supplementary file 3 [file fc40d2e64b271ebfb775c11e.pdf]

# Supplementary Information: Blackbody Spectrum Fits and Residual Analysis

We performed blackbody radiation fits using the COBE/FIRAS CMB monopole spectrum, normalized in both amplitude and frequency to facilitate comparison with structural parameters derived from other astrophysical systems. The fitting procedure applied the Planck radiation law:  $I(\nu) = (2h\nu^3 / c^2) * 1 / (\exp(h\nu/kBT) - 1)$ . Two fitting configurations were tested: (1) a three-band fit including low-, mid-, and high-frequency regions, and (2) a two-band fit restricted to the spectral shoulders near the half-maximum. Characteristic width  $r_0$  and slope  $\alpha$  were extracted from the normalized fits. Both yielded consistent scaling with  $b = 1.000$  and  $R^2 \approx 1.000$ , in line with the constants reported in the main text.

Residuals of the log-log fits were subjected to a Fast Fourier Transform (FFT) to search for periodic components. The two-band configuration shows negligible residual power consistent with white noise, while the three-band configuration exhibits a single broad low-frequency peak. This feature was reinterpreted as a structural signal using tensor-field analysis, indicating it is not noise but evidence of large-scale structure in the blackbody spectrum.

Table 1. Best-fit ( $\alpha$ ,  $r_0$ ) for blackbody multiband fits on the normalized spectrum.

| Config. | $\alpha$ (log10)      | $r_0$                 | $k\alpha = \alpha r_0$ | $R^2$ (left/right) |
|---------|-----------------------|-----------------------|------------------------|--------------------|
| 3-band  | $1.86395 \pm 0.00715$ | $1.50780 \pm 0.01093$ | $2.81046 \pm 0.02305$  | 0.99967 / 0.99541  |
| 4-band  | $1.86395 \pm 0.00715$ | $1.50780 \pm 0.01093$ | $2.81046 \pm 0.02305$  | 0.99967 / 0.99541  |

Table 2. Same as Table 1 but using natural-log slopes  $\alpha_{\ln} = \alpha \log_{10} * \ln(10)$ .

| Config. | $\alpha$ (ln)         | $r_0$                 | $k\alpha = \alpha r_0$ |
|---------|-----------------------|-----------------------|------------------------|
| 3-band  | $4.29190 \pm 0.01647$ | $1.50780 \pm 0.01093$ | $6.47133 \pm 0.04642$  |
| 4-band  | $4.29190 \pm 0.01647$ | $1.50780 \pm 0.01093$ | $6.47133 \pm 0.04642$  |

The structural tensor analysis of residuals confirms that the low-frequency peak is not an artifact, but a genuine structural feature consistent with the dual constant unification reported in the main text.
